# Supplementary material for: Axe: rapid, competitive sequence read demultiplexing using a trie
Source: Oxford University Press journal article supplement (doi:10.1093/bioinformatics/bty432), 2018-05-30
Supplement: bioinformatics_34_22_3924_s2.pdf [file bioinformatics_34_22_3924_s2.pdf]

# Supplementary Materials to ‘Axe: rapid, competitive sequence read demultiplexing using a trie’

Kevin D. Murray<sup>1</sup> and Justin O. Borevitz<sup>1</sup>

<sup>1</sup>ARC Centre of Excellence in Plant Energy Biology, Research School of Biology, ANU, Canberra, Australia

## Supplementary Methods

### Validation experiments

To quantify the performance of **axe** relative to similar tools, 10 million 100bp paired end reads were simulated from a random 1Mbp genome using Mason2 (Holtgrewe, 2010). Sets of index sequences of various sizes (see results) were drawn from the set of all 8-mers with a minimum hamming distance of 3. Sample frequencies were drawn from a gamma distribution with a shape parameter of 2; read pairs are randomly assigned a sample from these sample frequencies. Index sequences are inserted into the 5’ end of sequences and errors added with a frequency of  $10^{-2.5}$  (PHRED quality of 25). Combinatorial index sets were generated using the same process for each read.

These datasets were used to benchmark all operational modes of **axe**, alongside previous read demultiplexing software **flexbar**, **fastx** and **AdapterRemoval**. The precise versions and parameters for these programs, and the workflow which performs the simulations reported here, are available at <https://github.com/kdmurray91/axe-experiments>.

## References

Holtgrewe, M.

2010. Mason – A Read Simulator for Second Generation Sequencing Data. *Technical Report FU Berlin*.
